# Supplementary material
Source: PubMed Central journal article supplement (PMC4931348)
Supplement: Supp_Figure1.pdf [file Supp_Figure1.pdf]

## Supplementary Data

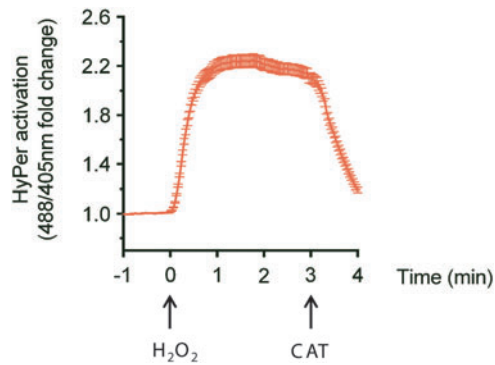

**SUPPLEMENTARY FIG. S1. HyPerCyto detects mainly H<sub>2</sub>O<sub>2</sub> imported through the plasma membrane.** Addition of extracellular catalase (CAT, 5000 U/ml) after H<sub>2</sub>O<sub>2</sub> exposure causes the rapid reduction of *HyPerCyto* by cytosolic antioxidant systems, indicating that continuous entry of exogenous H<sub>2</sub>O<sub>2</sub> is needed to sustain reoxidation of the sensor. These data also indicate that most if not all *HyPeroxidation* depends on exogenously added H<sub>2</sub>O<sub>2</sub>. The data represent the mean fold changes of the 488/405 nm ratio measured by confocal laser scanning, plotted against time  $\pm$  SEMs.
