# Supplementary material
Source: PubMed Central journal article supplement (PMC4931348)
Supplement: Supp_Figure2.pdf [file Supp_Figure2.pdf]

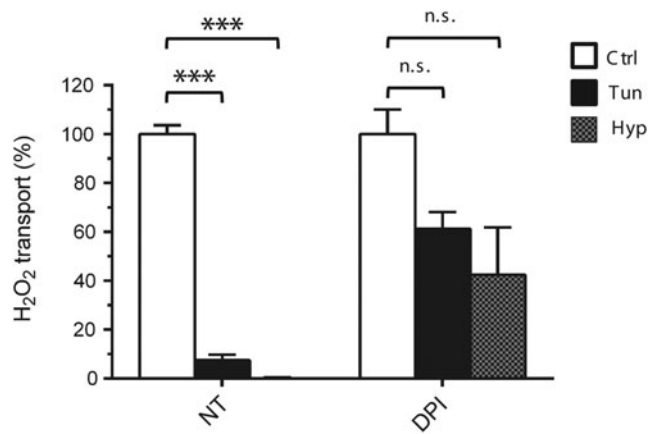

**SUPPLEMENTARY FIG. S2. DPI treatment partially prevents tunicamycin- and hypoxia-induced AQP8 blockade.** Cells were subjected to tunicamycin or hypoxic treatment with or without 10  $\mu$ M DPI. The data were normalized to the uptake of DPI-treated unstressed cells. Average of two experiments  $\pm$  SEM. \*\*\* $p$  < 0.001. AQP8, aquaporin-8; Ctrl, control; DPI, diphenyleneiodonium; Hyp, hypoxia; n.s., non significant; NT, nontreated cells; Tun, tunicamycin.
