# Supplementary material
Source: PubMed Central journal article supplement (PMC4931348)
Supplement: Supp_Figure5.pdf [file Supp_Figure5.pdf]

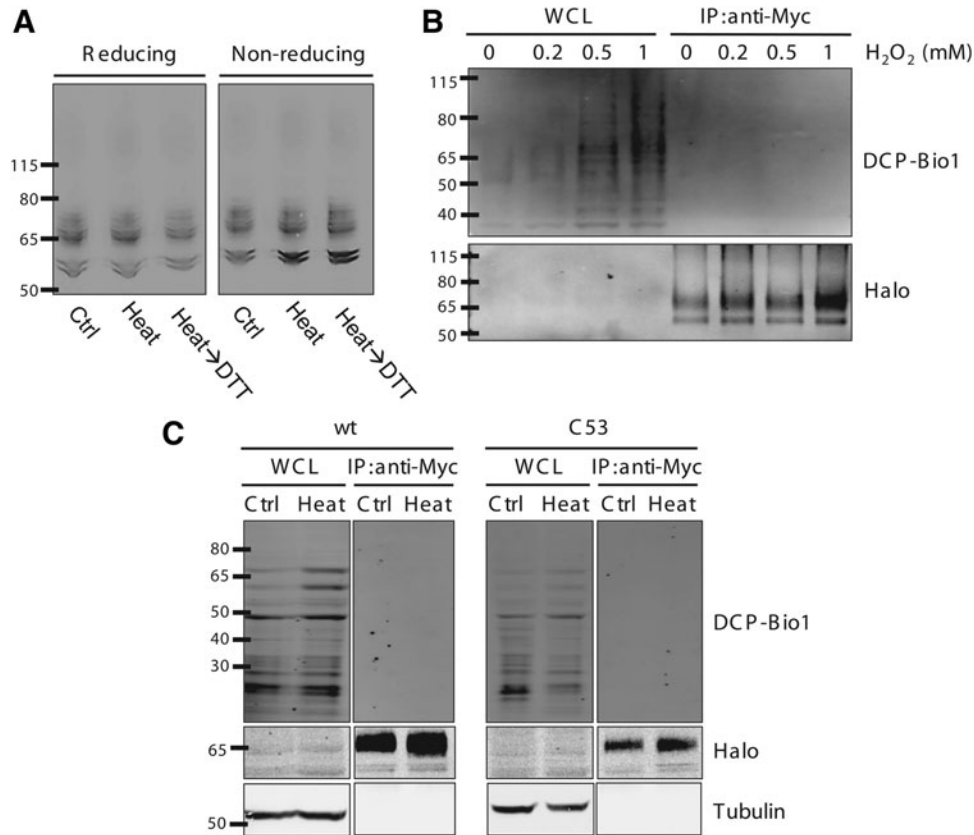

**SUPPLEMENTARY FIG. S5. No disulfide bonds nor sulfenylation is detectable in HaloAQP8.** (A) Western blot analyses under reducing or nonreducing conditions (*left and right panels*, respectively) do not reveal changes in the electrophoretic mobility of HaloAQP8 recombinant protein. The bands stained by anti-Halo correspond to HaloAQP8 nonglycosylated (a doublet of approximately 60–62 kDa) or glycosylated monomers (~71 kDa) and SDS-insoluble oligomers (~142 kDa). (B) HeLa cells expressing myc-tagged HaloAQP8 were exposed to increasing amounts of H<sub>2</sub>O<sub>2</sub> and treated during lysis in NP40 with a biotinylated probe designed to detect sulfenylated proteins (DCP-Bio 1). Aliquots of the lysates (WCL) and of the anti-myc immunoprecipitates were then resolved electrophoretically and blotted to detect sulfenylated proteins (streptavidin-FITC, *top panel*) and HaloAQP8 (anti-Halo, *lower panel*). (C) HeLa cells expressing myc-tagged wt or C53S HaloAQP8 were heat stressed and lysed in the presence of DCP-Bio1 as in (B). The same blot was then decorated with anti-tubulin (*lower panel*).
