# Supplementary material
Source: PubMed Central journal article supplement (PMC4931348)
Supplement: Supp_Figure6.pdf [file Supp_Figure6.pdf]

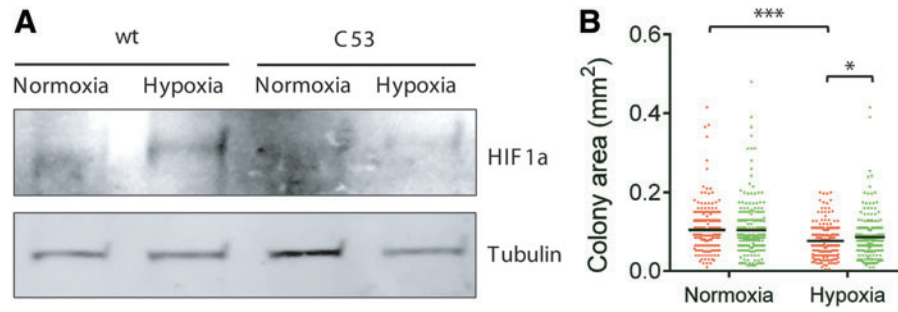

**SUPPLEMENTARY FIG. S6. Different sensitivity of wt and C53S AQP8-expressing cells to hypoxia.** (A) Cells stably expressing AQP8 wt or C53S were cultured in hypoxic conditions (24 h at 1% oxygen), lysed, and aliquots of the NP40 insoluble fraction decorated with anti-HIF1 $\alpha$  and anti-tubulin antibodies (*top and bottom panels*, respectively). (B). Measurement of colony area distribution in both AQP8 wt and C53S-expressing HeLa cells cultured in normoxic or hypoxic conditions for 24 h and then for further 7 days at 37°C in normoxia. Each dot represents a single colony and its area is displayed in mm<sup>2</sup>.
